# Supplementary material for: Physico-chemical properties and toxicological effects on plant and algal models of carbon nanosheets from a nettle fibre clone
Source: PubMed Central journal article supplement (PMC7994820; doi:10.1038/s41598-021-86426-5), 2021-03-25
Supplement: 41598_2021_86426_MOESM1_ESM.pdf [file 41598_2021_86426_MOESM1_ESM.pdf]

## **Physico-chemical properties and toxicological effects on plant and algal models of carbon nanosheets from a nettle fibre clone**

Syed Shaheen Shah<sup>1</sup>, Mohammed Ameen Ahmed Qasem<sup>1</sup>, Roberto Berni<sup>2,3</sup>, Cecilia Del Casino<sup>2</sup>, Giampiero Cai<sup>2</sup>, Servane Contal<sup>4</sup>, Irshad Ahmad<sup>5</sup>, Khawar Sohail Siddiqui<sup>6</sup>, Edoardo Gatti<sup>7</sup>, Stefano Predieri<sup>7</sup>, Jean-Francois Hausman<sup>8</sup>, Sébastien Cambier<sup>4</sup>, Gea Guerriero<sup>8,\*</sup> and Md. Abdul Aziz<sup>1,\*</sup>

<sup>1</sup>Center of Research Excellence in Nanotechnology, King Fahd University of Petroleum and Minerals, Dhahran 31261, Saudi Arabia.

<sup>2</sup>University of Siena, Department of Life Sciences, via P.A. Mattioli 4, I-53100 Siena, Italy.

<sup>3</sup>TERRA Teaching and Research Center, Gembloux Agro-Bio Tech, University of Liège, 5030 Gembloux, Belgium.

<sup>4</sup>Environmental Research and Innovation (ERIN) Department, Luxembourg Institute of Science and Technology (LIST), 5, avenue des Hauts-Fourneaux, Esch-sur-Alzette, Luxembourg.

<sup>5</sup>Life Sciences Department, King Fahd University of Petroleum and Minerals (KFUPM), Dhahran 31261, Saudi Arabia.

<sup>6</sup>School of Biotechnology and Biomolecular Sciences (BABS), The University of New South Wales, Sydney, NSW2052, Australia.

<sup>7</sup>Institute of Bioeconomy (IBE), National Research Council, Via P. Gobetti, 101-I, I-40129, Bologna, Italy.

<sup>8</sup>Environmental Research and Innovation (ERIN) Department, Luxembourg Institute of Science and Technology, 5, rue Bommel, Z.A.E. Robert Steichen, L-4940, Hautcharage, Luxembourg.

\* Authors to whom correspondence should be addressed: [gea.guerriero@list.lu](mailto:gea.guerriero@list.lu); [maziz@kfupm.edu.sa](mailto:maziz@kfupm.edu.sa)

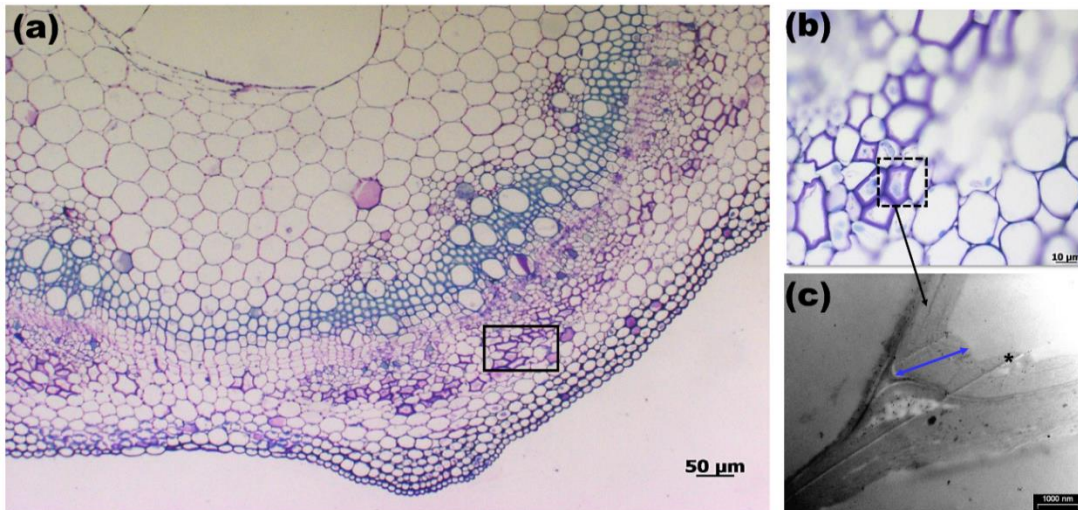

**Supplementary Figure 1:** Anatomy of the nettle stem. (a): Toluidine Blue O staining of a stem cross section (the square indicates bast fibres); (b): Magnified image showing a small cluster of three adjacent bast fibres (the dotted square indicates one bast fibre in transversal cross section); (c): immunoTEM image showing the gelatinous wall of nettle bast fibre (blue double-headed arrow) with gold nanoparticles denoting the presence of crystalline cellulose. The G-layer of nettle fibres shows a region with loose appearance (asterisk).

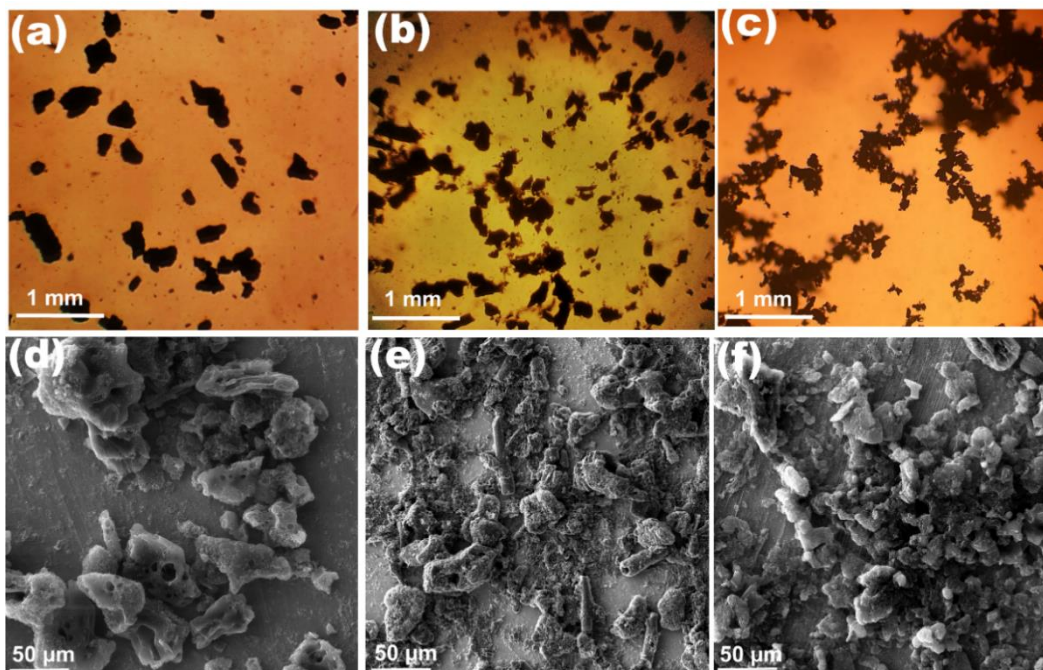

**Supplementary Figure 2:** Aggregates formed by the nettle CNS. (a) Stem-derived CNS, (b, c) leaf-derived CNS in BK<sub>SUC</sub> medium observed with an inverted microscope. FESEM images at low magnification of CNS prepared at 650 °C from nettle stem (d), leaves (e, f) and using NaHCO<sub>3</sub> as an activating agent. The ratio of nettle powder and NaHCO<sub>3</sub> is 1:1 (a, d and b, e) and 1:2 (c and f).

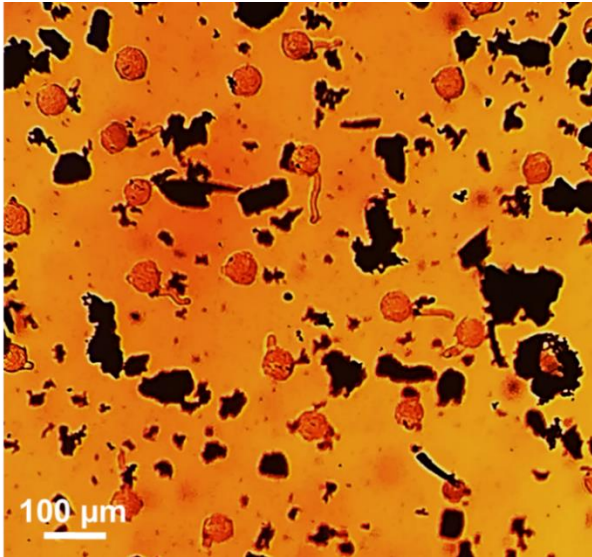

**Supplementary Figure 3:** Representative inverted microscopy image showing adhesion of CNS (in this case leaf CNS1:2 at 100  $\mu\text{g}/\text{mL}$ ) to the pollen grains.
